# Supplementary material for: Preharvest Abiotic Stress Affects the Nutritional Value of Lettuce
Source: MDPI journal article supplement (doi:10.3390/agronomy13020398), 2023-01-29
Supplement: s1 [file s1]

Archive with 3 entries (3 files):
- Compositional tables approach-supplement.pdf
- Supplementary Figures S1-S6.pdf
- Supplementary Tables S1-S5.pdf
