# Supplementary material for: Preharvest Abiotic Stress Affects the Nutritional Value of Lettuce
Source: MDPI journal article supplement (doi:10.3390/agronomy13020398), 2023-01-29
Supplement: s1 [file s1 › Supplementary Figures S1-S6.pdf]

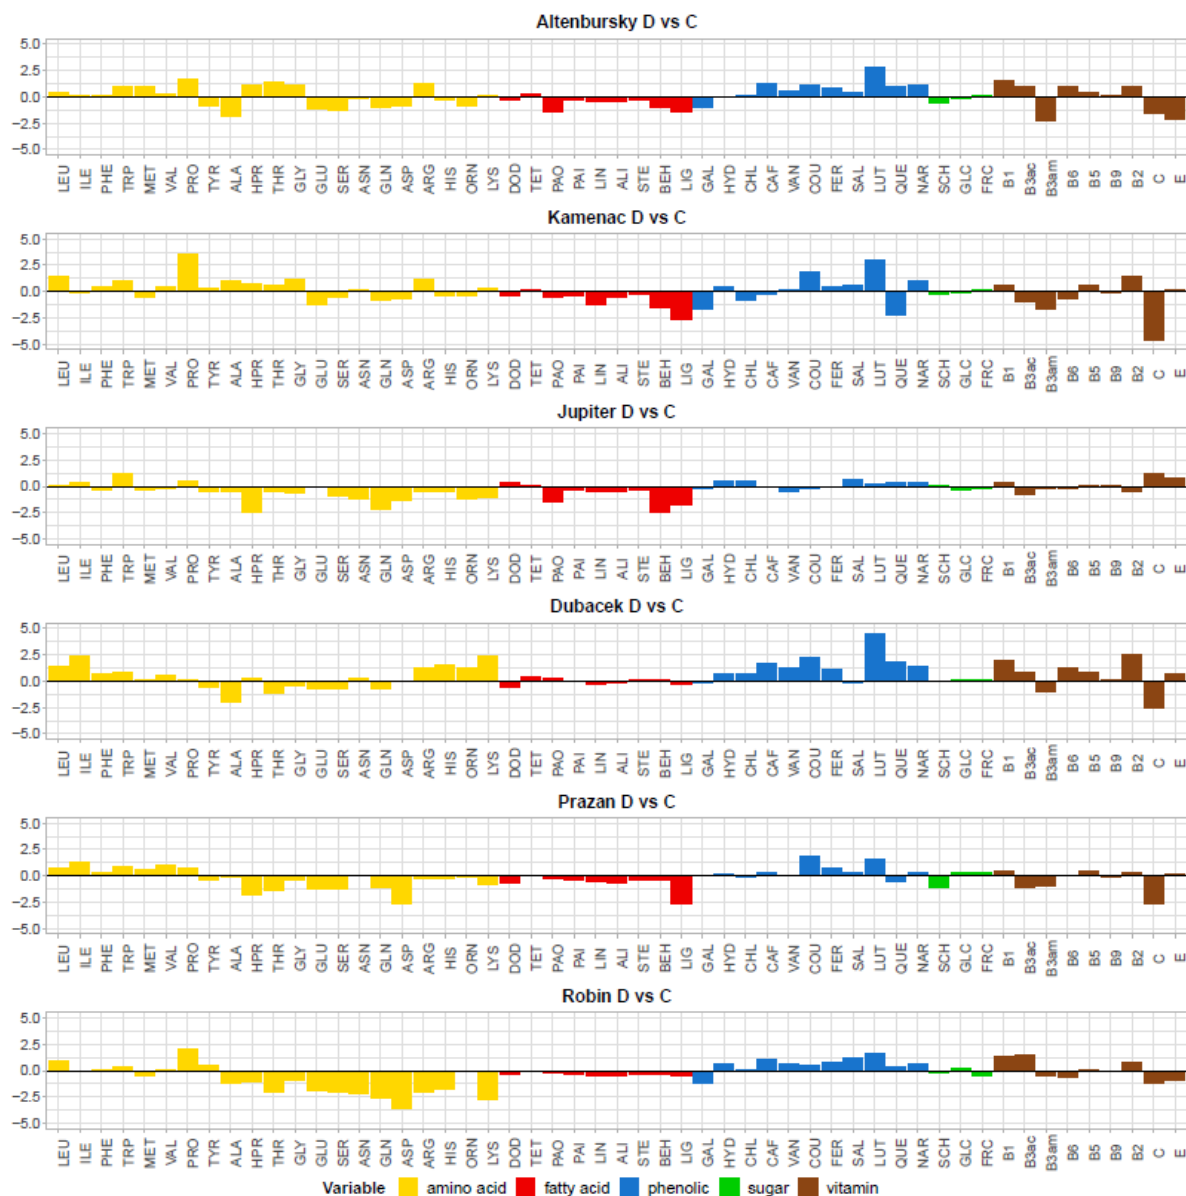

**Figure S1.** Barplots visualizing the log-ratios of value in drought stress to value in control condition for each of the variables, separately for each of the varieties.

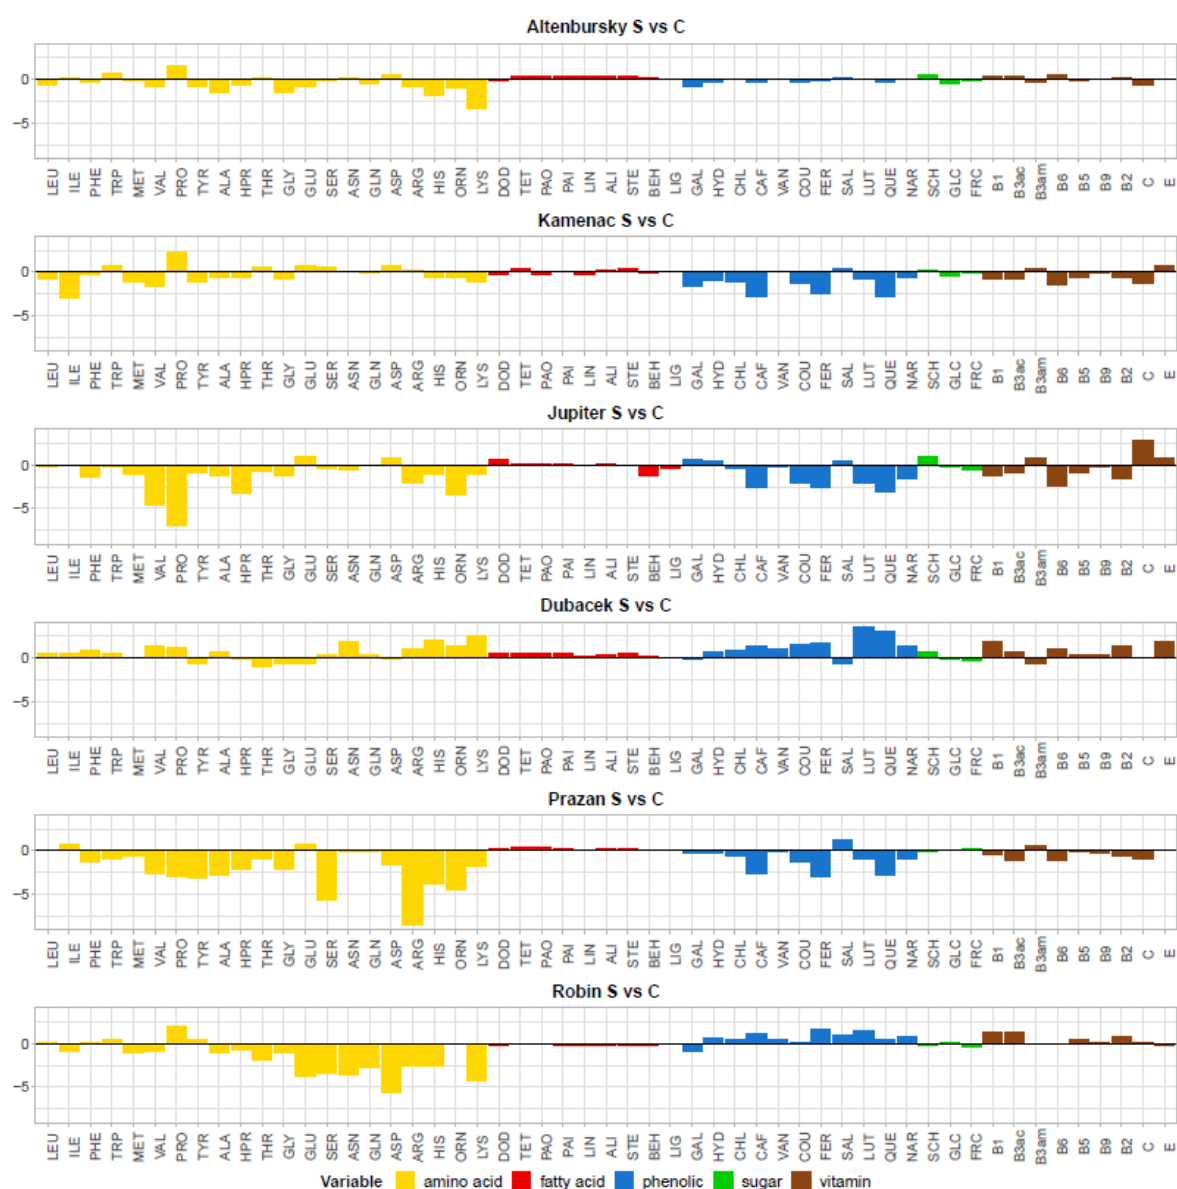

**Figure S2.** Barplots visualizing the log-ratios of value in salt stress to value in control condition for each of the variables, separately for each of the varieties.



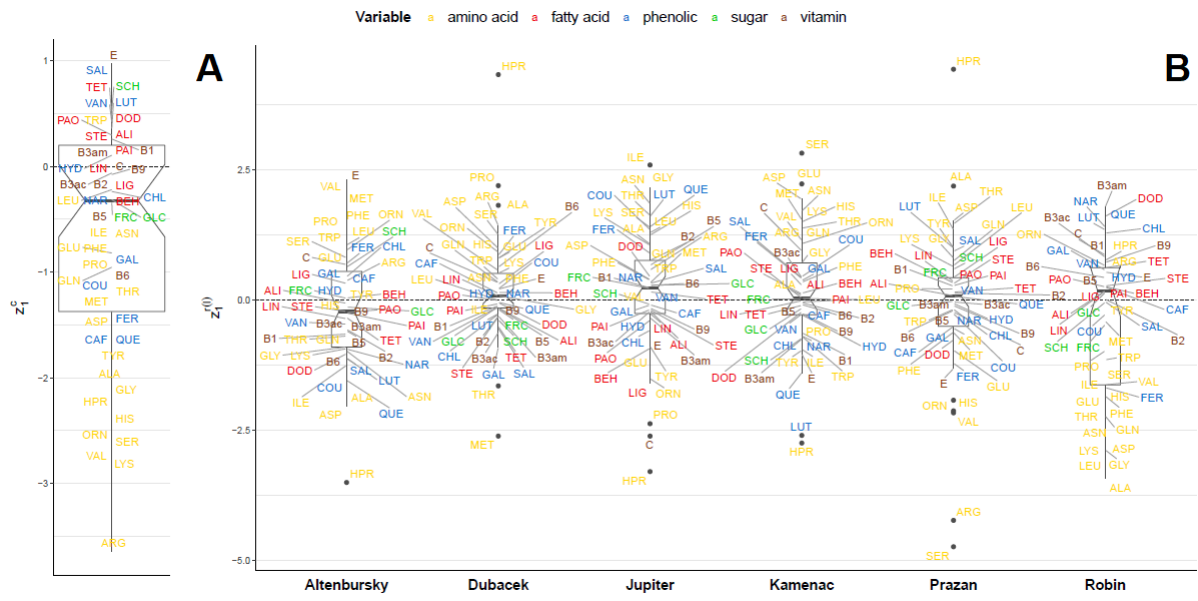

**Figure S4.** Boxplot of (A) coordinate  $z_1^c$  and (B) coordinates  $z_1^{r(l)}$  for the case of salt stress vs. control. The superscript  $l$  refers to the variety name.

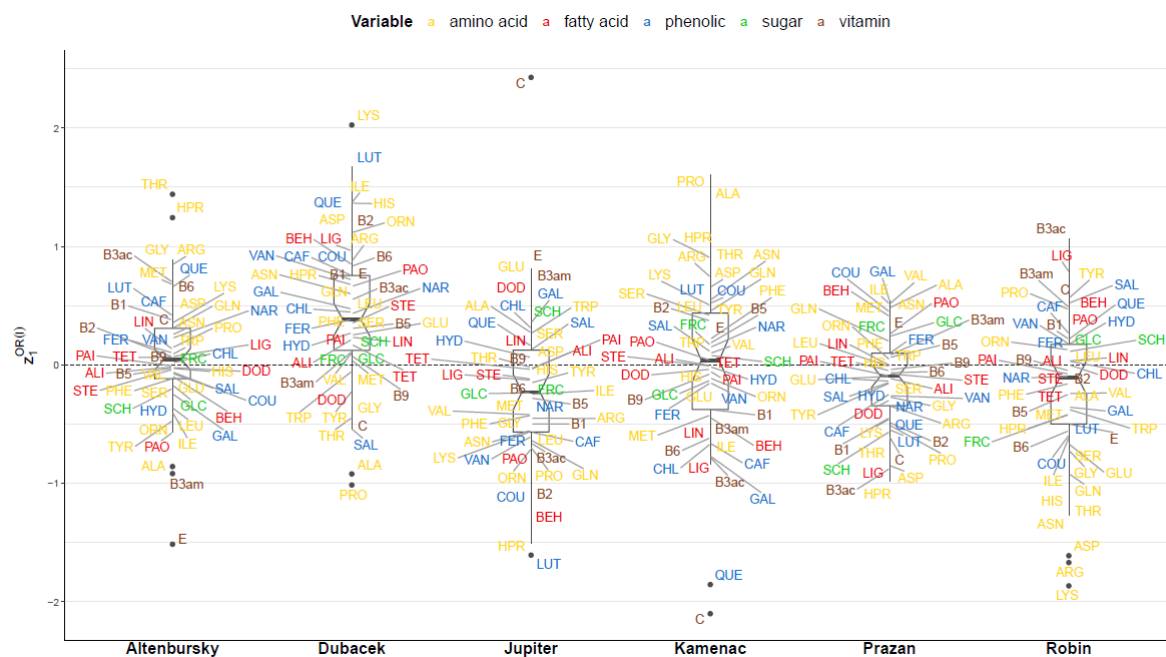

**Figure S5.** Boxplot of coordinate  $z_1^{OR(l)}$  for the case of drought vs. control. The superscript  $l$  refers to the variety name.

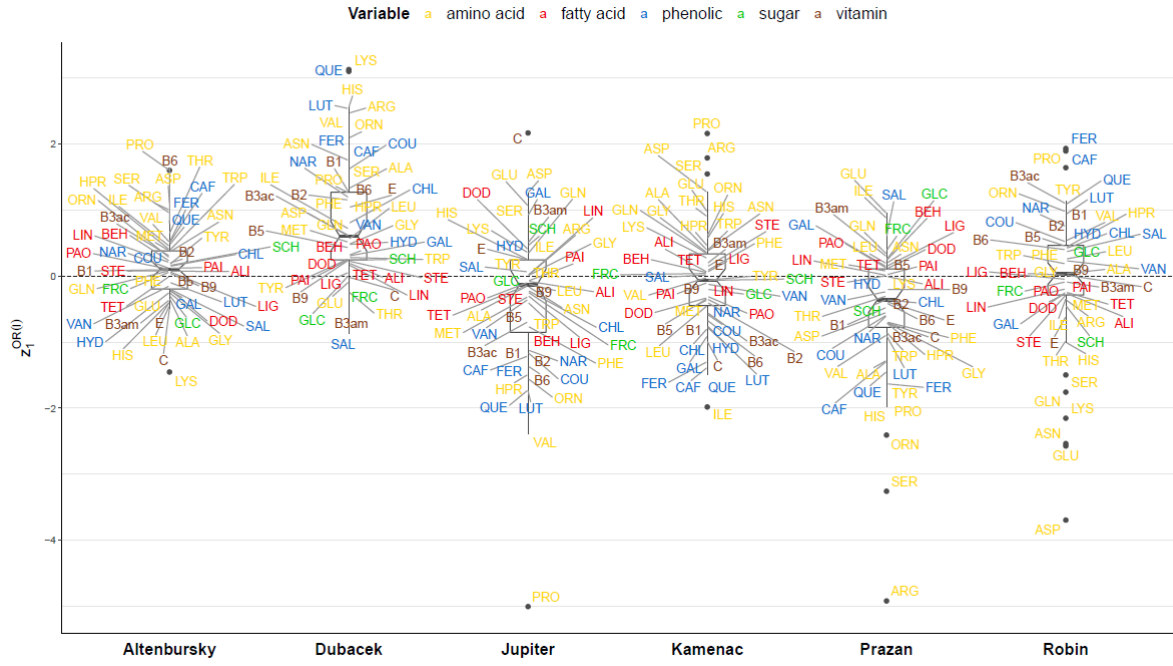

**Figure S6.** Boxplot of (A) coordinate  $z_1^{OR(l)}$  for the case of salt stress vs. control. The superscript  $l$  refers to the variety name.
