# Supplementary material for: Preharvest Abiotic Stress Affects the Nutritional Value of Lettuce
Source: MDPI journal article supplement (doi:10.3390/agronomy13020398), 2023-01-29
Supplement: s1 [file s1 › Supplementary Tables S1-S5.pdf]

**Table S1.** Free sugar content (mg/g DW) in investigated lettuce varieties grown under normal and stress conditions.

| CPD        | Growing conditions | Altenbursky | Kamenáč | Jupiter | Dubaček | Pražan | Robin   |
|------------|--------------------|-------------|---------|---------|---------|--------|---------|
| Saccharose | control            | 21.12       | 10.78   | 12.77   | 11.64   | 26.96  | 21.27   |
|            |                    | ± 0.42      | ± 0.53  | ± 0.22  | ± 0.45  | ± 1.22 | ± 1.62  |
|            | drought            | 19.81       | 10.47   | 18.24   | 13.94   | 15.76  | 18.73   |
|            |                    | ± 0.25      | ± 0.12  | ± 0.13  | ± 0.20  | ± 0.41 | ± 1.97  |
|            | salt               | 32.37       | 13.57   | 25.55   | 24.24   | 26.71  | 17.23   |
|            |                    | ± 0.74      | ± 0.59  | ± 0.62  | ± 1.22  | ± 1.07 | ± 0.42  |
| Glucose    | control            | 85.97       | 81.24   | 93.96   | 77.6    | 73.43  | 78.44   |
|            |                    | ± 2.33      | ± 9.77  | ± 1.75  | ± 1.89  | ± 1.97 | ± 10.49 |
|            | drought            | 67.77       | 66.88   | 76.2    | 83.22   | 89.56  | 93.54   |
|            |                    | ± 1.47      | ± 2.40  | ± 0.70  | ± 0.20  | ± 4.10 | ± 6.35  |
|            | salt               | 60.18       | 64.88   | 77.62   | 63.77   | 75.18  | 88.62   |
|            |                    | ± 0.45      | ± 1.25  | ± 2.10  | ± 6.05  | ± 2.47 | ± 2.27  |
| Fructose   | control            | 86.01       | 89.42   | 107.74  | 87.84   | 91.23  | 59.75   |
|            |                    | ± 1.51      | ± 5.05  | ± 0.28  | ± 1.42  | ± 3.17 | ± 1.61  |
|            | drought            | 83.61       | 95.58   | 83.78   | 88.83   | 115.34 | 41.04   |
|            |                    | ± 5.18      | ± 3.20  | ± 1.29  | ± 1.88  | ± 4.50 | ± 2.80  |
|            | salt               | 77.23       | 83.33   | 72.67±  | 62.99   | 101.4  | 48.98   |
|            |                    | ± 4.92      | ± 3.27  | 1.65    | ± 1.84  | ± 7.45 | ± 1.23  |

**Table S2.** Free amino acid content ( $\mu\text{g/g DW}$ ) in investigated lettuce varieties grown under normal and stress conditions.

| CPD           | Growing conditions | Altenbursky | Kamenač     | Jupiter     | Dubaček     | Pražan      | Robin      |
|---------------|--------------------|-------------|-------------|-------------|-------------|-------------|------------|
| Leucine       | control            | 7.33        | 5.03        | 6.76        | 2.78        | 4.80        | 0.38       |
|               |                    | $\pm 0.53$  | $\pm 0.13$  | $\pm 1.42$  | $\pm 0.49$  | $\pm 0.29$  | $\pm 0.12$ |
|               | drought            | 7.36        | 9.74        | 6.18        | 5.67        | 6.69        | 0.61       |
|               |                    | $\pm 1.27$  | $\pm 1.63$  | $\pm 2.04$  | $\pm 0.69$  | $\pm 2.13$  | $\pm 0.14$ |
|               | salt               | 3.13        | 3.02        | 3.95        | 3.01        | 2.84        | 0.36       |
|               |                    | $\pm 0.40$  | $\pm 0.14$  | $\pm 0.58$  | $\pm 0.43$  | $\pm 0.89$  | $\pm 0.05$ |
| Isoleucine    | control            | 0.40        | 1.96        | 5.59        | 2.38        | 2.74        | 0.45       |
|               |                    | $\pm 0.18$  | $\pm 0.39$  | $\pm 1.16$  | $\pm 0.27$  | $\pm 0.39$  | $\pm 0.11$ |
|               | drought            | 0.38        | 1.40        | 6.09        | 5.53        | 5.10        | 0.37       |
|               |                    | $\pm 0.26$  | $\pm 0.24$  | $\pm 1.04$  | $\pm 1.12$  | $\pm 0.90$  | $\pm 0.08$ |
|               | salt               | 1.07        | 1.59        | 3.64        | 1.27        | 2.49        | 0.21       |
|               |                    | $\pm 0.46$  | $\pm 0.01$  | $\pm 0.70$  | $\pm 0.86$  | $\pm 0.59$  | $\pm 0.07$ |
| Phenylalanine | control            | 12.34       | 5.94        | 9.06        | 3.63        | 5.31        | 1.10       |
|               |                    | $\pm 3.77$  | $\pm 0.96$  | $\pm 2.28$  | $\pm 0.26$  | $\pm 0.50$  | $\pm 0.30$ |
|               | drought            | 10.99       | 7.57        | 5.70        | 5.79        | 5.43        | 1.12       |
|               |                    | $\pm 2.60$  | $\pm 0.94$  | $\pm 0.84$  | $\pm 0.35$  | $\pm 0.44$  | $\pm 0.31$ |
|               | salt               | 7.14        | 4.75        | 2.53        | 6.17        | 1.25        | 1.18       |
|               |                    | $\pm 0.66$  | $\pm 0.17$  | $\pm 0.32$  | $\pm 1.28$  | $\pm 0.31$  | $\pm 0.28$ |
| Tryptophan    | control            | 9.01        | 2.63        | 14.34       | 5.64        | 7.70        | 1.85       |
|               |                    | $\pm 0.60$  | $\pm 0.47$  | $\pm 1.41$  | $\pm 0.60$  | $\pm 0.91$  | $\pm 0.54$ |
|               | drought            | 16.09       | 5.23        | 20.95       | 8.69        | 11.84       | 2.43       |
|               |                    | $\pm 0.94$  | $\pm 1.15$  | $\pm 7.30$  | $\pm 0.72$  | $\pm 2.38$  | $\pm 0.36$ |
|               | salt               | 9.96        | 4.57        | 5.39        | 7.36        | 2.41        | 2.78       |
|               |                    | $\pm 1.10$  | $\pm 0.29$  | $\pm 1.23$  | $\pm 3.09$  | $\pm 0.47$  | $\pm 0.94$ |
| Methionine    | control            | 0.40        | 0.31        | 0.14        | 0.01        | 0.06        | 0.08       |
|               |                    | $\pm 0.18$  | $\pm 0.12$  | $\pm 0.03$  | $\pm 0.01$  | $\pm 0.01$  | $\pm 0.02$ |
|               | drought            | 0.52        | 0.17        | 0.09        | 0.02        | 0.15        | 0.05       |
|               |                    | $\pm 0.22$  | $\pm 0.05$  | $\pm 0.02$  | $\pm 0.01$  | $\pm 0.09$  | $\pm 0.01$ |
|               | salt               | 0.29        | 0.11        | 0.05        | 0.03        | 0.12        | 0.03       |
|               |                    | $\pm 0.15$  | $\pm 0.02$  | $\pm 0.03$  | $\pm 0.00$  | $\pm 0.10$  | $\pm 0.02$ |
| Valine        | control            | 15.68       | 11.95       | 22.56       | 2.02        | 3.41        | 1.20       |
|               |                    | $\pm 2.46$  | $\pm 1.26$  | $\pm 2.46$  | $\pm 0.23$  | $\pm 0.84$  | $\pm 0.36$ |
|               | drought            | 15.36       | 13.27       | 14.44       | 3.44        | 4.66        | 1.24       |
|               |                    | $\pm 2.75$  | $\pm 1.66$  | $\pm 6.33$  | $\pm 0.35$  | $\pm 1.55$  | $\pm 0.20$ |
|               | salt               | 7.10        | 7.56        | 0.53        | 5.02        | 0.35        | 0.70       |
|               |                    | $\pm 0.89$  | $\pm 0.52$  | $\pm 0.14$  | $\pm 0.75$  | $\pm 0.14$  | $\pm 0.50$ |
| Proline       | control            | 42.59       | 36.44       | 194.73      | 60.65       | 154.37      | 11.69      |
|               |                    | $\pm 3.11$  | $\pm 0.72$  | $\pm 32.49$ | $\pm 9.46$  | $\pm 14.70$ | $\pm 0.33$ |
|               | drought            | 125.61      | 161.46      | 209.76      | 72.63       | 194.00      | 36.20      |
|               |                    | $\pm 39.03$ | $\pm 71.85$ | $\pm 4.66$  | $\pm 17.27$ | $\pm 18.67$ | $\pm 2.94$ |
|               | salt               | 92.07       | 85.77       | 15.68       | 169.74      | 6.29        | 33.63      |
|               |                    | $\pm 11.12$ | $\pm 9.25$  | $\pm 0.32$  | $\pm 78.67$ | $\pm 3.87$  | $\pm 7.57$ |
| Tyrosine      | control            | 5.41        | 3.93        | 2.92        | 8.23        | 34.11       | 3.46       |
|               |                    | $\pm 2.22$  | $\pm 0.65$  | $\pm 0.40$  | $\pm 2.62$  | $\pm 6.06$  | $\pm 1.19$ |
|               | drought            | 2.66        | 4.21        | 2.16        | 5.26        | 18.35       | 5.08       |
|               |                    | $\pm 0.91$  | $\pm 0.94$  | $\pm 1.27$  | $\pm 3.18$  | $\pm 4.22$  | $\pm 1.18$ |
|               | salt               | 3.43        | 1.97        | 4.27        | 15.15       | 2.43        | 5.08       |
|               |                    | $\pm 0.89$  | $\pm 0.25$  | $\pm 0.44$  | $\pm 2.58$  | $\pm 0.62$  | $\pm 0.40$ |

Table S2. Continued.

| CPD            | Growing conditions | Altenbursky       | Kamenáč            | Jupiter            | Dubaček            | Pražan               | Robin            |
|----------------|--------------------|-------------------|--------------------|--------------------|--------------------|----------------------|------------------|
| Alanine        | control            | 74.84<br>± 11.76  | 313.55<br>± 63.55  | 532.81<br>± 175.17 | 278.89<br>± 181.71 | 1938.89<br>± 538.73  | 21.80<br>± 4.89  |
|                | drought            | 19.10<br>± 3.40   | 428.81<br>± 130.66 | 291.14<br>± 131.54 | 214.74<br>± 13.90  | 1612.82<br>± 1043.29 | 9.65<br>± 2.24   |
|                | salt               | 56.41<br>± 9.60   | 268.89<br>± 32.56  | 253.04<br>± 41.85  | 929.93<br>± 115.49 | 119.56<br>± 40.24    | 10.22<br>± 5.51  |
|                |                    | 0.93<br>± 0.20    | 1.44<br>± 0.41     | 1.87<br>± 0.48     | 86.44<br>± 30.61   | 179.62<br>± 81.01    | 8.58<br>± 2.43   |
| Hydroxyproline | control            | 1.41<br>± 0.46    | 1.71<br>± 0.76     | 0.18<br>± 0.10     | 89.01<br>± 19.59   | 32.45<br>± 16.23     | 3.58<br>± 1.64   |
|                | drought            | 0.61<br>± 0.16    | 0.92<br>± 0.08     | 26.61<br>± 0.07    | 126.14<br>± 16.97  | 21.76<br>± 6.30      | 4.84<br>± 1.15   |
|                | salt               | 60.89<br>± 8.54   | 157.72<br>± 39.45  | 247.43<br>± 61.29  | 30.15<br>± 3.55    | 241.94<br>± 102.42   | 32.71<br>± 8.51  |
|                |                    | 126.29<br>± 19.80 | 213.47<br>± 37.67  | 157.38<br>± 46.02  | 11.77<br>± 2.13    | 79.71<br>± 29.71     | 6.08<br>± 1.05   |
| Threonine      | control            | 58.92<br>± 22.44  | 240.36<br>± 34.63  | 113.30<br>± 46.51  | 72.78<br>± 4.75    | 89.03<br>± 7.08      | 6.59<br>± 1.94   |
|                | drought            | 8.14<br>± 0.92    | 15.34<br>± 5.16    | 32.31<br>± 11.69   | 6.25<br>± 1.84     | 21.16<br>± 5.46      | 1.04<br>± 0.41   |
|                | salt               | 12.74<br>± 2.28   | 26.23<br>± 9.58    | 16.88<br>± 6.11    | 3.51<br>± 1.04     | 12.21<br>± 1.84      | 0.46<br>± 0.09   |
|                |                    | 2.80<br>± 0.46    | 15.36<br>± 0.70    | 9.64<br>± 1.74     | 7.36<br>± 1.88     | 2.26<br>± 0.71       | 0.43<br>± 0.14   |
| Glycine        | control            | 24.60<br>± 1.63   | 29.09<br>± 8.71    | 3.99<br>± 0.66     | 24.90<br>± 5.73    | 3.72<br>± 1.12       | 21.17<br>± 6.67  |
|                | drought            | 10.97<br>± 2.10   | 26.28<br>± 0.75    | 5.24<br>± 0.24     | 15.07<br>± 3.08    | 3.13<br>± 0.34       | 3.11<br>± 0.62   |
|                | salt               | 19.07<br>± 3.13   | 58.63<br>± 6.15    | 15.91<br>± 0.85    | 13.15<br>± 3.57    | 15.90<br>± 1.94      | 0.60<br>± 0.16   |
|                |                    | 17.03<br>± 9.64   | 45.10<br>± 2.58    | 26.89<br>± 2.56    | 17.01<br>± 3.50    | 9.38<br>± 11.66      | 16.89<br>± 5.66  |
| Glutamate      | control            | 8.78<br>± 4.09    | 42.48<br>± 5.44    | 16.15<br>± 0.76    | 16.65<br>± 1.57    | 1.76<br>± 0.27       | 2.27<br>± 0.69   |
|                | drought            | 24.91<br>± 2.99   | 72.73<br>± 6.35    | 21.97<br>± 2.94    | 22.94<br>± 6.99    | 6.98<br>± 0.02       | 0.72<br>± 0.20   |
|                | salt               | 4.16<br>± 0.54    | 29.07<br>± 2.73    | 33.88<br>± 4.25    | 5.29<br>± 1.26     | 8.25<br>± 5.38       | 10.04<br>± 1.65  |
|                |                    | 5.07<br>± 2.29    | 32.05<br>± 2.51    | 15.73<br>± 1.74    | 15.99<br>± 1.33    | 7.70<br>± 1.40       | 1.25<br>± 0.37   |
| Serine         | control            | 10.70<br>± 1.48   | 34.02<br>± 3.33    | 18.88<br>± 3.55    | 24.45<br>± 12.67   | 8.25<br>± 1.38       | 0.34<br>± 0.06   |
|                | drought            | 70.57<br>± 25.95  | 208.26<br>± 85.96  | 144.63<br>± 39.02  | 93.10<br>± 25.49   | 155.56<br>± 38.58    | 82.99<br>± 20.74 |
|                | salt               | 43.44<br>± 7.09   | 125.80<br>± 11.73  | 61.81<br>± 2.80    | 123.61<br>± 51.58  | 88.27<br>± 4.06      | 7.30<br>± 4.19   |
|                |                    | 127.37<br>± 22.84 | 194.74<br>± 19.21  | 150.10<br>± 22.48  | 184.42<br>± 93.64  | 152.74<br>± 18.58    | 6.83<br>± 3.35   |
| Asparagine     | control            |                   |                    |                    |                    |                      |                  |
|                | drought            |                   |                    |                    |                    |                      |                  |
|                | salt               |                   |                    |                    |                    |                      |                  |
|                |                    |                   |                    |                    |                    |                      |                  |
| Glutamine      | control            |                   |                    |                    |                    |                      |                  |
|                | drought            |                   |                    |                    |                    |                      |                  |
|                | salt               |                   |                    |                    |                    |                      |                  |
|                |                    |                   |                    |                    |                    |                      |                  |

Table S2. Continued.

| CPD       | Growing conditions | Altenbursky | Kamenáč | Jupiter | Dubaček | Pražan  | Robin   |
|-----------|--------------------|-------------|---------|---------|---------|---------|---------|
| Aspartate | control            | 14.08       | 172.11  | 59.85   | 160.71  | 375.04  | 173.49  |
|           |                    | ± 6.92      | ± 37.29 | ± 12.41 | ± 17.64 | ± 52.00 | ± 41.18 |
|           | drought            | 14.23       | 163.89  | 53.34   | 153.64  | 60.37   | 4.76    |
|           |                    | ± 4.98      | ± 9.69  | ± 2.20  | ± 22.16 | ± 10.69 | ± 0.50  |
|           | salt               | 79.83       | 330.31  | 157.70  | 251.09  | 142.51  | 0.83    |
|           |                    | ± 1.61      | ± 80.40 | ± 20.91 | ± 46.20 | ± 28.67 | ± 0.36  |
| Arginine  | control            | 16.59       | 19.42   | 21.15   | 16.10   | 24.14   | 25.30   |
|           |                    | ± 1.08      | ± 3.93  | ± 5.31  | ± 1.43  | ± 2.10  | ± 4.10  |
|           | drought            | 29.52       | 27.73   | 12.24   | 30.67   | 14.11   | 3.72    |
|           |                    | ± 2.54      | ± 11.44 | ± 1.82  | ± 10.15 | ± 2.57  | ± 1.77  |
|           | salt               | 7.51        | 14.19   | 4.42    | 24.21   | 7.51    | 2.63    |
|           |                    | ± 1.88      | ± 1.56  | ± 0.95  | ± 5.49  | ± 0.01  | ± 1.17  |
| Histidine | control            | 3.86        | 5.59    | 6.25    | 2.91    | 3.58    | 1.80    |
|           |                    | ± 0.79      | ± 2.48  | ± 1.41  | ± 0.56  | ± 0.51  | ± 0.30  |
|           | drought            | 2.59        | 4.19    | 4.05    | 7.54    | 2.07    | 0.33    |
|           |                    | ± 0.44      | ± 1.87  | ± 0.84  | ± 2.09  | ± 0.93  | ± 0.14  |
|           | salt               | 2.87        | 3.87    | 2.27    | 7.66    | 0.65    | 0.18    |
|           |                    | ± 0.61      | ± 0.63  | ± 0.91  | ± 3.37  | ± 0.04  | ± 0.09  |
| Ornithine | control            | 0.31        | 0.28    | 0.21    | 0.18    | 0.28    | 0.16    |
|           |                    | ± 0.14      | ± 0.15  | ± 0.11  | ± 0.02  | ± 0.13  | ± 0.04  |
|           | drought            | 0.16        | 0.22    | 0.07    | 0.43    | 0.18    | 0.16    |
|           |                    | ± 0.04      | ± 0.12  | ± 0.02  | ± 0.04  | ± 0.03  | ± 0.09  |
|           | salt               | 0.22        | 0.20    | 0.04    | 0.35    | 0.05    | 0.18    |
|           |                    | ± 0.03      | ± 0.04  | ± 0.02  | ± 0.18  | ± 0.00  | ± 0.08  |
| Lysine    | control            | 8.21        | 11.77   | 7.00    | 4.59    | 7.70    | 2.59    |
|           |                    | ± 1.29      | ± 3.22  | ± 1.48  | ± 0.38  | ± 1.58  | ± 0.60  |
|           | drought            | 6.77        | 13.50   | 2.99    | 11.81   | 3.21    | 0.24    |
|           |                    | ± 3.35      | ± 5.79  | ± 1.09  | ± 4.93  | ± 1.39  | ± 0.22  |
|           | salt               | 4.08        | 4.67    | 2.23    | 11.32   | 1.79    | 0.05    |
|           |                    | ± 0.28      | ± 0.53  | ± 0.61  | ± 4.79  | ± 0.37  | ± 0.02  |

**Table S3.** Fatty acid content ( $\mu\text{g/g DW}$ ) in investigated lettuce varieties grown under normal and stress conditions.

| CPD                           | Growing conditions | Altenbursky | Kamenač     | Jupiter     | Dubaček    | Pražan      | Robin       |
|-------------------------------|--------------------|-------------|-------------|-------------|------------|-------------|-------------|
| C12:0                         | control            | 1.10        | 2.01        | 2.01        | 1.51       | 1.06        | 6.03        |
|                               |                    | $\pm 0.25$  | $\pm 0.49$  | $\pm 0.87$  | $\pm 0.12$ | $\pm 0.19$  | $\pm 1.05$  |
|                               | drought            | 0.84        | 1.38        | 2.90        | 0.84       | 0.53        | 4.53        |
|                               |                    | $\pm 0.37$  | $\pm 0.09$  | $\pm 0.38$  | $\pm 0.09$ | $\pm 0.11$  | $\pm 0.21$  |
|                               | salt               | 1.00        | 1.54        | 3.86        | 2.55       | 1.49        | 4.19        |
|                               |                    | $\pm 0.05$  | $\pm 0.12$  | $\pm 0.73$  | $\pm 0.27$ | $\pm 0.43$  | $\pm 0.76$  |
| C14:0                         | control            | 0.34        | 0.37        | 0.53        | 0.27       | 0.47        | 0.74        |
|                               |                    | $\pm 0.08$  | $\pm 0.08$  | $\pm 0.22$  | $\pm 0.01$ | $\pm 0.10$  | $\pm 0.13$  |
|                               | drought            | 0.46        | 0.45        | 0.56        | 0.39       | 0.47        | 0.64        |
|                               |                    | $\pm 0.21$  | $\pm 0.02$  | $\pm 0.07$  | $\pm 0.04$ | $\pm 0.10$  | $\pm 0.01$  |
|                               | salt               | 0.44        | 0.55        | 0.56        | 0.44       | 0.66        | 0.77        |
|                               |                    | $\pm 0.03$  | $\pm 0.03$  | $\pm 0.05$  | $\pm 0.05$ | $\pm 0.17$  | $\pm 0.44$  |
| C16:1<br>( $\Delta 9$ )       | control            | 0.55        | 0.86        | 0.59        | 0.55       | 0.77        | 0.88        |
|                               |                    | $\pm 0.13$  | $\pm 0.20$  | $\pm 0.27$  | $\pm 0.04$ | $\pm 0.10$  | $\pm 0.14$  |
|                               | drought            | 0.35        | 0.47        | 0.28        | 0.69       | 0.59        | 0.70        |
|                               |                    | $\pm 0.29$  | $\pm 0.04$  | $\pm 0.24$  | $\pm 0.07$ | $\pm 0.13$  | $\pm 0.03$  |
|                               | salt               | 0.73        | 0.67        | 0.59        | 0.98       | 1.08        | 0.92        |
|                               |                    | $\pm 0.04$  | $\pm 0.05$  | $\pm 0.12$  | $\pm 0.09$ | $\pm 0.23$  | $\pm 0.46$  |
| C16:0                         | control            | 14.01       | 19.38       | 17.24       | 14.23      | 20.83       | 22.96       |
|                               |                    | $\pm 2.96$  | $\pm 4.20$  | $\pm 7.21$  | $\pm 0.52$ | $\pm 3.29$  | $\pm 4.63$  |
|                               | drought            | 10.82       | 13.11       | 11.58       | 14.80      | 13.59       | 15.02       |
|                               |                    | $\pm 4.57$  | $\pm 1.72$  | $\pm 1.86$  | $\pm 2.42$ | $\pm 2.48$  | $\pm 0.32$  |
|                               | salt               | 18.56       | 19.31       | 17.24       | 22.70      | 24.85       | 14.63       |
|                               |                    | $\pm 0.95$  | $\pm 1.05$  | $\pm 2.99$  | $\pm 2.11$ | $\pm 6.07$  | $\pm 0.86$  |
| C18:2<br>( $\Delta 9,12$ )    | control            | 16.47       | 27.01       | 20.83       | 21.99      | 29.46       | 30.05       |
|                               |                    | $\pm 3.54$  | $\pm 5.72$  | $\pm 8.94$  | $\pm 1.20$ | $\pm 4.60$  | $\pm 6.54$  |
|                               | drought            | 11.72       | 10.02       | 13.01       | 16.63      | 16.47       | 17.23       |
|                               |                    | $\pm 5.21$  | $\pm 6.82$  | $\pm 2.17$  | $\pm 1.76$ | $\pm 3.35$  | $\pm 0.54$  |
|                               | salt               | 21.62       | 20.64       | 20.66       | 28.05      | 31.01       | 19.08       |
|                               |                    | $\pm 1.14$  | $\pm 1.35$  | $\pm 4.21$  | $\pm 2.08$ | $\pm 8.43$  | $\pm 2.69$  |
| C18:3<br>( $\Delta 9,12,15$ ) | control            | 51.28       | 59.05       | 53.91       | 44.15      | 59.04       | 74.41       |
|                               |                    | $\pm 11.39$ | $\pm 12.46$ | $\pm 23.25$ | $\pm 2.75$ | $\pm 9.78$  | $\pm 16.05$ |
|                               | drought            | 33.96       | 36.79       | 30.91       | 36.99      | 32.52       | 43.85       |
|                               |                    | $\pm 14.86$ | $\pm 5.74$  | $\pm 5.17$  | $\pm 3.89$ | $\pm 6.91$  | $\pm 1.67$  |
|                               | salt               | 66.07       | 74.51       | 55.36       | 67.69      | 70.66       | 48.48       |
|                               |                    | $\pm 3.53$  | $\pm 4.66$  | $\pm 11.27$ | $\pm 4.69$ | $\pm 19.54$ | $\pm 4.74$  |
| C18:0                         | control            | 1.17        | 1.41        | 1.49        | 0.99       | 1.73        | 2.04        |
|                               |                    | $\pm 0.25$  | $\pm 0.31$  | $\pm 0.65$  | $\pm 0.08$ | $\pm 0.27$  | $\pm 0.35$  |
|                               | drought            | 0.92        | 1.06        | 0.93        | 1.21       | 1.22        | 1.36        |
|                               |                    | $\pm 0.39$  | $\pm 0.16$  | $\pm 0.15$  | $\pm 0.19$ | $\pm 0.25$  | $\pm 0.01$  |
|                               | salt               | 1.51        | 1.96        | 1.32        | 1.57       | 2.07        | 1.45        |
|                               |                    | $\pm 0.04$  | $\pm 0.11$  | $\pm 0.25$  | $\pm 0.16$ | $\pm 0.52$  | $\pm 0.38$  |
| C22:0                         | control            | 0.45        | 0.53        | 0.54        | 0.45       | 0.53        | 0.60        |
|                               |                    | $\pm 0.09$  | $\pm 0.10$  | $\pm 0.32$  | $\pm 0.01$ | $\pm 0.06$  | $\pm 0.17$  |
|                               | drought            | 0.36        | 0.25        | 0.13        | 0.54       | 0.37        | 0.44        |
|                               |                    | $\pm 0.30$  | $\pm 0.21$  | $\pm 0.21$  | $\pm 0.12$ | $\pm 0.13$  | $\pm 0.02$  |
|                               | salt               | 0.51        | 0.48        | 0.30        | 0.58       | 0.64        | 0.55        |
|                               |                    | $\pm 0.06$  | $\pm 0.01$  | $\pm 0.24$  | $\pm 0.11$ | $\pm 0.22$  | $\pm 0.29$  |

**Table S3.** Continued.

| CPD   | Growing conditions | Altenbursky | Kamenáč | Jupiter | Dubaček | Pražan | Robin  |
|-------|--------------------|-------------|---------|---------|---------|--------|--------|
| C24:0 | control            | 0.60        | 0.58    | 0.62    | 0.60    | 0.60   | 0.64   |
|       |                    | ± 0.16      | ± 0.05  | ± 0.63  | ± 0.18  | ± 0.07 | ± 0.25 |
|       | drought            | 0.30        | 0.14    | 0.12    | 0.45    | 0.15   | 0.36   |
|       |                    | ± 0.25      | ± 0.23  | ± 0.18  | ± 0.12  | ± 0.23 | ± 0.05 |
|       | salt               | 0.62        | 0.59    | 0.31    | 0.63    | 0.74   | 0.59   |
|       |                    | ± 0.14      | ± 0.02  | ± 0.26  | ± 0.24  | ± 0.37 | ± 0.31 |

C12:0 – dodecanoic acid, C14:0 – tetradecanoic acid, C16:1 ( $\Delta$ 9) – palmitoleic acid, C16:0 – palmitic acid, C18:2 ( $\Delta$ 9,12) – linoleic acid, C18:3 ( $\Delta$ 9,12,15) –  $\alpha$ -linolenic acid, C18:0 – stearic acid, C22:0 – behenic acid, C24:0 – lignoceric acid.

**Table S4.** Free phenolic compounds content ( $\mu\text{g/g DW}$ ) in investigated lettuce varieties grown under normal and stress conditions.

| CPD  | Growing conditions | Altenbursky  | Kamenač      | Jupiter       | Dubaček       | Pražan        | Robin         |
|------|--------------------|--------------|--------------|---------------|---------------|---------------|---------------|
| GA   | control            | 0.99         | 1.24         | 0.35          | 0.36          | 0.44          | 0.97          |
|      |                    | $\pm 0.53$   | $\pm 0.39$   | $\pm 0.07$    | $\pm 0.10$    | $\pm 0.06$    | $\pm 0.19$    |
|      | drought            | 0.50         | 0.31         | 0.54          | 0.29          | 0.43          | 0.32          |
|      |                    | $\pm 0.08$   | $\pm 0.03$   | $\pm 0.05$    | $\pm 0.16$    | $\pm 0.02$    | $\pm 0.07$    |
|      | salt               | 0.75         | 0.33         | 0.69          | 0.30          | 0.57          | 0.61          |
|      |                    | $\pm 0.30$   | $\pm 0.07$   | $\pm 0.46$    | $\pm 0.03$    | $\pm 0.05$    | $\pm 0.37$    |
| 4HBA | control            | 4.72         | 5.51         | 2.80          | 2.87          | 4.09          | 3.98          |
|      |                    | $\pm 0.05$   | $\pm 0.62$   | $\pm 0.39$    | $\pm 1.05$    | $\pm 1.09$    | $\pm 0.68$    |
|      | drought            | 4.45         | 5.77         | 4.29          | 5.66          | 4.16          | 5.82          |
|      |                    | $\pm 0.40$   | $\pm 1.02$   | $\pm 0.46$    | $\pm 1.78$    | $\pm 0.24$    | $\pm 0.46$    |
|      | salt               | 3.73         | 2.00         | 3.30          | 5.04          | 3.27          | 6.49          |
|      |                    | $\pm 0.32$   | $\pm 0.35$   | $\pm 1.69$    | $\pm 0.88$    | $\pm 0.09$    | $\pm 1.49$    |
| CGA  | control            | 6767.15      | 5014.27      | 4899.48       | 3452.11       | 6102.26       | 9695.02       |
|      |                    | $\pm 263.99$ | $\pm 441.47$ | $\pm 325.74$  | $\pm 356.04$  | $\pm 1334.38$ | $\pm 339.77$  |
|      | drought            | 7052.45      | 2484.92      | 6232.81       | 5029.72       | 5027.13       | 10221.29      |
|      |                    | $\pm 411.21$ | $\pm 510.98$ | $\pm 90.82$   | $\pm 485.42$  | $\pm 572.41$  | $\pm 525.70$  |
|      | salt               | 6470.83      | 2323.49      | 2998.99       | 6992.18       | 4866.85       | 14581.63      |
|      |                    | $\pm 755.79$ | $\pm 331.54$ | $\pm 1329.47$ | $\pm 1976.32$ | $\pm 348.02$  | $\pm 4615.50$ |
| CA   | control            | 421.16       | 605.38       | 563.90        | 215.06        | 547.52        | 167.18        |
|      |                    | $\pm 9.05$   | $\pm 33.63$  | $\pm 29.19$   | $\pm 8.10$    | $\pm 81.35$   | $\pm 1.88$    |
|      | drought            | 711.65       | 404.54       | 431.72        | 497.04        | 508.56        | 289.61        |
|      |                    | $\pm 49.60$  | $\pm 12.27$  | $\pm 73.49$   | $\pm 37.59$   | $\pm 95.50$   | $\pm 29.90$   |
|      | salt               | 293.63       | 174.23       | 67.62         | 374.25        | 55.01         | 401.69        |
|      |                    | $\pm 17.41$  | $\pm 12.03$  | $\pm 32.92$   | $\pm 67.20$   | $\pm 2.79$    | $\pm 161.43$  |
| VA   | control            | 6.27         | 6.05         | 8.07          | 5.88          | 8.99          | 9.18          |
|      |                    | $\pm 2.03$   | $\pm 0.29$   | $\pm 1.60$    | $\pm 2.95$    | $\pm 1.16$    | $\pm 0.58$    |
|      | drought            | 7.77         | 7.20         | 6.66          | 14.54         | 9.03          | 12.08         |
|      |                    | $\pm 0.56$   | $\pm 1.32$   | $\pm 1.17$    | $\pm 3.57$    | $\pm 2.07$    | $\pm 2.76$    |
|      | salt               | 5.71         | 6.69         | 7.30          | 10.25         | 8.03          | 13.80         |
|      |                    | $\pm 2.25$   | $\pm 1.91$   | $\pm 2.28$    | $\pm 3.64$    | $\pm 2.20$    | $\pm 5.39$    |
| COU  | control            | 0.80         | 6.71         | 7.00          | 0.92          | 4.40          | 1.02          |
|      |                    | $\pm 0.03$   | $\pm 0.30$   | $\pm 1.13$    | $\pm 0.06$    | $\pm 0.12$    | $\pm 0.03$    |
|      | drought            | 1.26         | 14.33        | 4.72          | 7.93          | 8.34          | 1.17          |
|      |                    | $\pm 0.14$   | $\pm 0.54$   | $\pm 0.28$    | $\pm 4.93$    | $\pm 1.19$    | $\pm 0.05$    |
|      | salt               | 0.94         | 2.26         | 0.95          | 3.46          | 0.59          | 1.03          |
|      |                    | $\pm 0.06$   | $\pm 0.15$   | $\pm 0.66$    | $\pm 4.45$    | $\pm 0.06$    | $\pm 0.42$    |
| FA   | control            | 5.82         | 14.57        | 17.74         | 2.66          | 8.29          | 0.49          |
|      |                    | $\pm 0.90$   | $\pm 1.79$   | $\pm 0.05$    | $\pm 0.06$    | $\pm 1.05$    | $\pm 0.05$    |
|      | drought            | 8.72         | 14.41        | 12.59         | 6.49          | 8.58          | 0.92          |
|      |                    | $\pm 0.08$   | $\pm 3.10$   | $\pm 2.18$    | $\pm 1.59$    | $\pm 1.89$    | $\pm 0.11$    |
|      | salt               | 5.66         | 5.22         | 1.48          | 11.90         | 0.32          | 2.48          |
|      |                    | $\pm 1.43$   | $\pm 0.10$   | $\pm 0.43$    | $\pm 4.08$    | $\pm 0.02$    | $\pm 1.63$    |
| SA   | control            | 2.39         | 5.98         | 5.65          | 5.06          | 5.71          | 4.74          |
|      |                    | $\pm 0.30$   | $\pm 0.29$   | $\pm 0.70$    | $\pm 0.51$    | $\pm 2.71$    | $\pm 0.39$    |
|      | drought            | 3.24         | 9.69         | 9.96          | 3.93          | 9.47          | 8.80          |
|      |                    | $\pm 0.18$   | $\pm 0.84$   | $\pm 1.70$    | $\pm 1.46$    | $\pm 0.63$    | $\pm 0.71$    |
|      | salt               | 3.23         | 7.35         | 7.63          | 2.54          | 13.25         | 7.75          |
|      |                    | $\pm 0.57$   | $\pm 1.40$   | $\pm 3.89$    | $\pm 0.88$    | $\pm 1.42$    | $\pm 1.77$    |

Table S4. Continued.

| CPD | Growing conditions | Altenbursky | Kamenáč | Jupiter | Dubaček | Pražan | Robin  |
|-----|--------------------|-------------|---------|---------|---------|--------|--------|
| LUT | control            | 3.80        | 2.12    | 11.91   | 1.28    | 9.06   | 3.05   |
|     |                    | ± 0.14      | ± 0.04  | ± 1.84  | ± 0.06  | ± 1.32 | ± 0.08 |
|     | drought            | 9.00        | 6.29    | 11.38   | 28.73   | 17.28  | 8.36   |
|     |                    | ± 1.30      | ± 1.08  | ± 2.04  | ± 9.79  | ± 3.51 | ± 1.98 |
|     | salt               | 0.66        | 2.55    | 1.23    | 10.79   | 1.73   | 7.05   |
|     |                    | ± 0.04      | ± 0.06  | ± 0.65  | ± 1.58  | ± 0.24 | ± 1.30 |
| QUE | control            | 2.94        | 5.92    | 58.60   | 4.46    | 19.58  | 9.75   |
|     |                    | ± 0.08      | ± 1.10  | ± 15.80 | ± 0.10  | ± 5.60 | ± 0.53 |
|     | drought            | 4.25        | 0.77    | 58.37   | 6.50    | 9.12   | 13.41  |
|     |                    | ± 0.75      | ± 0.07  | ± 3.45  | ± 6.63  | ± 1.34 | ± 2.32 |
|     | salt               | 2.81        | 10.98   | 2.25    | 34.21   | 3.32   | 14.91  |
|     |                    | ± 0.08      | ± 0.21  | ± 0.85  | ± 14.61 | ± 0.11 | ± 2.99 |
| NAR | control            | 0.02        | 0.03    | 0.05    | 0.01    | 0.03   | 0.04   |
|     |                    | ± 0.00      | ± 0.01  | ± 0.00  | ± 0.00  | ± 0.01 | ± 0.00 |
|     | drought            | 0.03        | 0.04    | 0.06    | 0.04    | 0.03   | 0.06   |
|     |                    | ± 0.00      | ± 0.01  | ± 0.01  | ± 0.02  | ± 0.01 | ± 0.01 |
|     | salt               | 0.01        | 0.02    | 0.01    | 0.04    | 0.02   | 0.07   |
|     |                    | ± 0.00      | ± 0.01  | ± 0.00  | ± 0.00  | ± 0.00 | ± 0.02 |

GA – gallic acid, 4HBA – 4-hydroxybenzoic acid, CGA – chlorogenic acid, CA – caffeic acid, VA – vanillic acid, COU – *p*-coumaric acid, FA – ferulic acid, SA – salicylic acid, LUT – luteolin, QUE – quercetin, NAR – naringenin.

**Table S5.** Vitamin content ( $\mu\text{g/g}$  DW) in investigated lettuce varieties grown under normal and stress conditions.

| CPD | Growing conditions | Altenbursky | Kamenač    | Jupiter    | Dubaček    | Pražan     | Robin       |
|-----|--------------------|-------------|------------|------------|------------|------------|-------------|
| B1  | control            | 0.06        | 0.10       | 0.22       | 0.04       | 0.16       | 0.10        |
|     |                    | $\pm 0.00$  | $\pm 0.01$ | $\pm 0.01$ | $\pm 0.00$ | $\pm 0.07$ | $\pm 0.00$  |
|     | drought            | 0.27        | 0.17       | 0.33       | 0.28       | 0.28       | 0.36        |
|     |                    | $\pm 0.01$  | $\pm 0.0$  | $\pm 0.00$ | $\pm 0.01$ | $\pm 0.15$ | $\pm 0.04$  |
|     | salt               | 0.08        | 0.05       | 0.06       | 0.24       | 0.10       | 0.34        |
|     |                    | $\pm 0.00$  | $\pm 0.00$ | $\pm 0.01$ | $\pm 0.08$ | $\pm 0.02$ | $\pm 0.08$  |
| B2  | control            | 0.04        | 0.09       | 0.24       | 0.03       | 0.09       | 0.05        |
|     |                    | $\pm 0.01$  | $\pm 0.01$ | $\pm 0.00$ | $\pm 0.00$ | $\pm 0.00$ | $\pm 0.00$  |
|     | drought            | 0.11        | 0.34       | 0.16       | 0.31       | 0.15       | 0.10        |
|     |                    | $\pm 0.00$  | $\pm 0.02$ | $\pm 0.00$ | $\pm 0.03$ | $\pm 0.09$ | $\pm 0.01$  |
|     | salt               | 0.05        | 0.05       | 0.05       | 0.11       | 0.06       | 0.10        |
|     |                    | $\pm 0.05$  | $\pm 0.00$ | $\pm 0.01$ | $\pm 0.01$ | $\pm 0.01$ | $\pm 0.02$  |
| B3  | control            | 1.06        | 2.33       | 1.75       | 0.91       | 2.10       | 2.07        |
|     |                    | $\pm 0.08$  | $\pm 0.16$ | $\pm 0.30$ | $\pm 0.10$ | $\pm 0.29$ | $\pm 0.11$  |
|     | drought            | 1.95        | 0.91       | 1.03       | 1.30       | 0.78       | 4.84        |
|     |                    | $\pm 0.21$  | $\pm 0.34$ | $\pm 0.30$ | $\pm 0.17$ | $\pm 0.25$ | $\pm 0.41$  |
|     | salt               | 1.28        | 1.28       | 1.06       | 1.31       | 1.10       | 4.96        |
|     |                    | $\pm 0.03$  | $\pm 0.12$ | $\pm 0.31$ | $\pm 0.14$ | $\pm 0.20$ | $\pm 0.80$  |
| B5  | control            | 0.36        | 0.61       | 1.17       | 0.36       | 0.45       | 0.51        |
|     |                    | $\pm 0.01$  | $\pm 0.02$ | $\pm 0.03$ | $\pm 0.01$ | $\pm 0.11$ | $\pm 0.02$  |
|     | drought            | 0.52        | 1.17       | 1.24       | 0.82       | 0.98       | 0.57        |
|     |                    | $\pm 0.01$  | $\pm 0.01$ | $\pm 0.03$ | $\pm 0.04$ | $\pm 0.70$ | $\pm 0.02$  |
|     | salt               | 0.30        | 0.33       | 0.49       | 0.53       | 0.38       | 0.82        |
|     |                    | $\pm 0.01$  | $\pm 0.01$ | $\pm 0.20$ | $\pm 0.11$ | $\pm 0.06$ | $\pm 0.33$  |
| B9  | control            | 0.08        | 0.09       | 0.09       | 0.08       | 0.10       | 0.14        |
|     |                    | $\pm 0.00$  | $\pm 0.00$ | $\pm 0.01$ | $\pm 0.00$ | $\pm 0.00$ | $\pm 0.01$  |
|     | drought            | 0.09        | 0.08       | 0.10       | 0.09       | 0.10       | 0.13        |
|     |                    | $\pm 0.00$  | $\pm 0.00$ | $\pm 0.00$ | $\pm 0.00$ | $\pm 0.04$ | $\pm 0.01$  |
|     | salt               | 0.09        | 0.07       | 0.08       | 0.10       | 0.08       | 0.16        |
|     |                    | $\pm 0.01$  | $\pm 0.00$ | $\pm 0.01$ | $\pm 0.01$ | $\pm 0.00$ | $\pm 0.03$  |
| C   | control            | 36.30       | 59.89      | 0.79       | 21.74      | 15.85      | 31.08       |
|     |                    | $\pm 1.26$  | $\pm 9.33$ | $\pm 0.11$ | $\pm 4.48$ | $\pm 3.01$ | $\pm 11.03$ |
|     | drought            | 8.19        | 0.60       | 2.81       | 1.76       | 2.13       | 8.89        |
|     |                    | $\pm 1.62$  | $\pm 0.07$ | $\pm 0.75$ | $\pm 0.78$ | $\pm 2.01$ | $\pm 1.36$  |
|     | salt               | 20.78       | 17.30      | 13.78      | 22.16      | 10.12      | 32.50       |
|     |                    | $\pm 6.51$  | $\pm 0.92$ | $\pm .36$  | $\pm 4.94$ | $\pm 3.21$ | $\pm 10.31$ |
| E   | control            | 0.71        | 0.06       | 0.07       | 0.07       | 0.07       | 0.26        |
|     |                    | $\pm 0.13$  | $\pm 0.00$ | $\pm 0.00$ | $\pm 0.00$ | $\pm 0.00$ | $\pm 0.02$  |
|     | drought            | 0.08        | 0.07       | 0.16       | 0.14       | 0.08       | 0.11        |
|     |                    | $\pm 0.02$  | $\pm 0.00$ | $\pm 0.03$ | $\pm 0.02$ | $\pm 0.01$ | $\pm 0.01$  |
|     | salt               | 0.75        | 0.12       | 0.16       | 0.49       | 0.07       | 0.21        |
|     |                    | $\pm 0.20$  | $\pm 0.01$ | $\pm 0.01$ | $\pm 0.10$ | $\pm 0.00$ | $\pm 0.02$  |
